# Supplementary figures and images for: The calpain small subunit regulates cell-substrate mechanical interactions during fibroblast migration
Source: Oxford University Press journal article supplement (doi:10.1242/jcs.036152), 2008-10-08

Vinculin

Actin

Capn1 siRNA

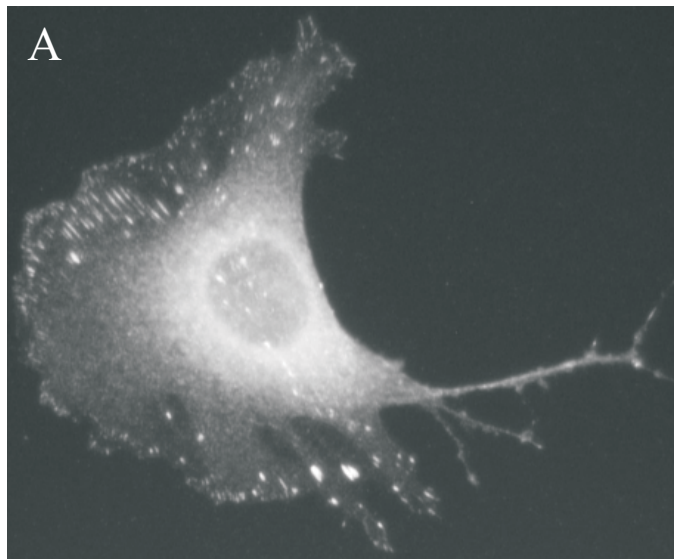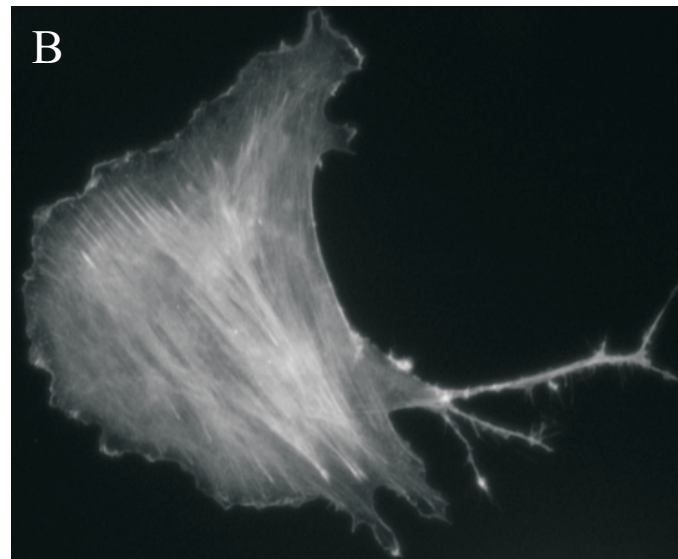

Capn2 siRNA

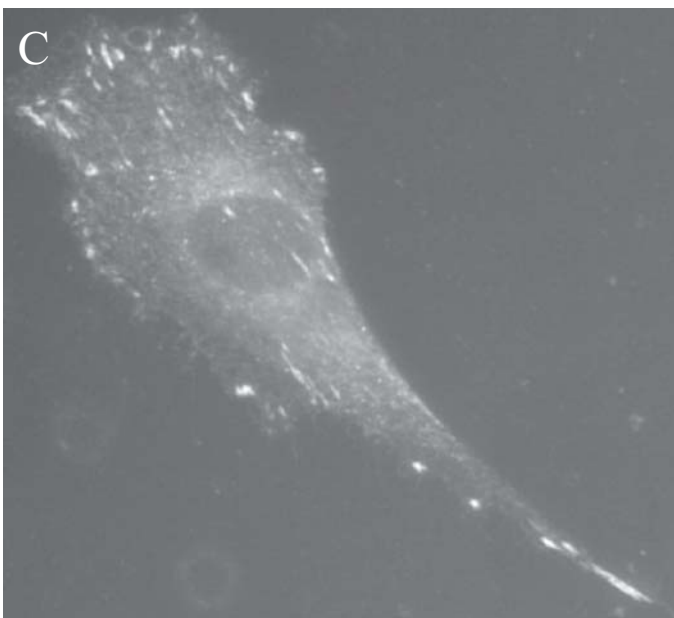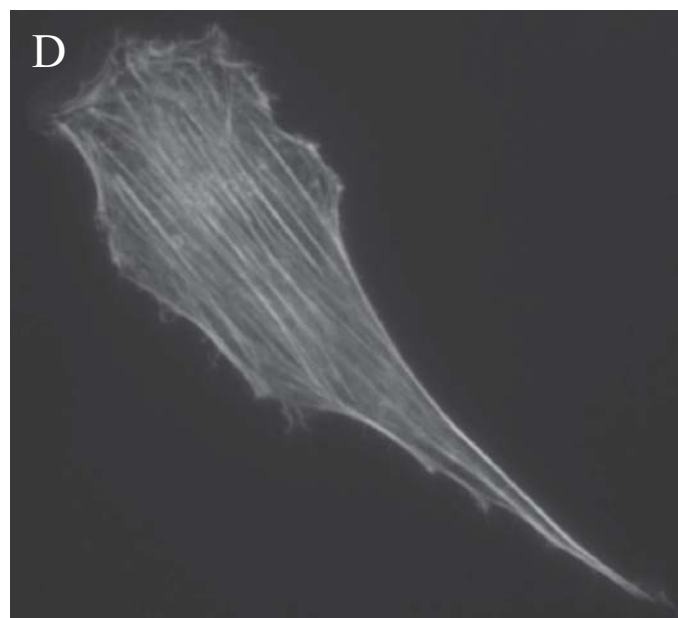

Calpastatin

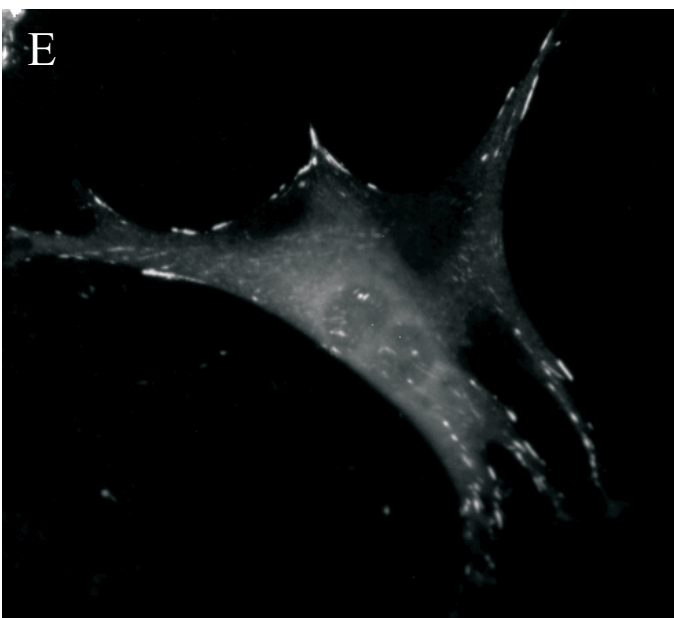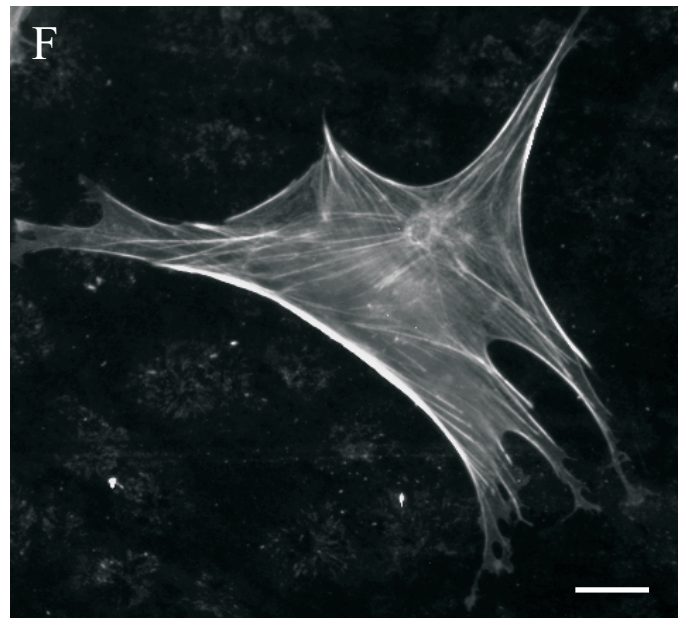

Supplement: jcs036152-sup-036152figs3.pdf [file jcs036152-sup-036152figs3.pdf]
